# Supplementary material for: Central administration of sodium-glucose cotransporter-2 inhibitors increases food intake involving adenosine monophosphate-activated protein kinase phosphorylation in the lateral hypothalamus in healthy rats
Source: PubMed Central journal article supplement — BMJ Open Diabetes Res Care. 2021 Apr 20;9(1):e002104. doi: 10.1136/bmjdrc-2020-002104 (PMC8061802; doi:10.1136/bmjdrc-2020-002104), 2021-04-20
Supplement: bmjdrc-2020-002104supp001.pdf [file bmjdrc-2020-002104supp001.pdf]

## Supplemental Figure 1

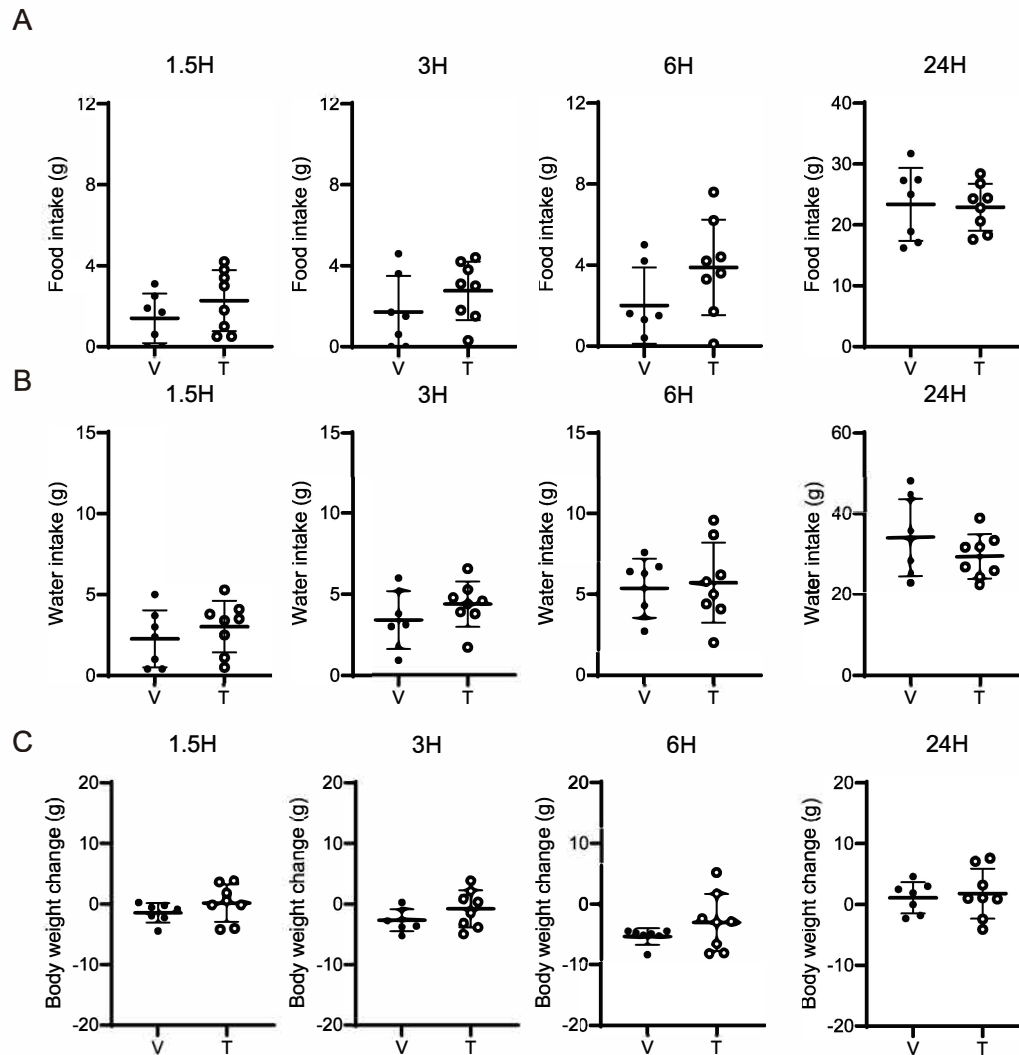

**Supplemental Figure 1. Effects of systemic tofogliflozin administration on food intake, water intake, and body weight**

Tofogliflozin (0.52  $\mu\text{mol}$ ) was injected intraperitoneally, and food and water intake, and body weight changes were measured at 1.5, 3, 6, and 24 h after the injection. A: Cumulative food intake after tofogliflozin injection B: Cumulative water intake after tofogliflozin injection C: Body weight change after tofogliflozin injection Data are presented as the mean  $\pm$  SD. V: vehicle, T: tofogliflozin A–C (V, T)  $n = 7$  and  $8$ , respectively.
